# Supplementary material for: Regional Differences in the Association between Dietary Patterns and Muscle Strength in Korean Older Adults: Data from the Korea National Health and Nutrition Examination Survey 2014–2016
Source: PubMed Central journal article supplement (PMC7284570; doi:10.3390/nu12051377), 2020-05-12
Supplement: nutrients-12-01377-s001.pdf [file nutrients-12-01377-s001.pdf]

Table S1. Food groups and items used in the dietary pattern analysis

| <b>Food group</b>                   | <b>Food items</b>                                                                             |
|-------------------------------------|-----------------------------------------------------------------------------------------------|
| White rice                          | White rice                                                                                    |
| Other grain                         | Brown rice, barley, millet, maize, etc.                                                       |
| Noodles and dumpling                | Noodle, ramen, somyon, udong, dumpling, etc.                                                  |
| Flour and bread                     | Wheat flour, breads, doughnuts, cakes, etc.                                                   |
| Pizza, hamburger, cereals and snack | Pizza, hamburger, sandwich, cereal, cracker, snack, cookie, popcorn, biscuits, chip, etc.     |
| Potatoes                            | Potato, french fried potato, sweet potato, etc.                                               |
| Sugars and sweets                   | White sugar, honey, candy, chocolates, jelly, caramel, etc.                                   |
| Legumes                             | Soybean, curd, green peas, red bean, etc.                                                     |
| Nuts and seeds                      | Peanuts, almonds, walnut, sunflower seed, etc.                                                |
| Vegetables                          | All kinds of vegetables, etc.                                                                 |
| Kimchi                              | All kinds of kimchi, etc.                                                                     |
| Mushrooms                           | All kinds of mushroom, etc.                                                                   |
| Fruits                              | Citrus fruit, strawberry, melon, banana, peach, orange, fruit juices, etc.                    |
| Meats and meat products             | Beef, pork, ham, sausage, meatball, bacon, chicken, turkey, etc.                              |
| Eggs                                | Egg, cooked egg, fried egg, etc.                                                              |
| Fishes and seafood                  | Mackerel, bastard halibut, flat fish, canned tuna, anchovy, squid, etc.                       |
| Seaweeds                            | Seaweed, kelp, etc.                                                                           |
| Milk and dairy products             | Milk, ice cream, yoghurt, cheese, etc.                                                        |
| Oils                                | Olive oil, corn oil, sesame oil, etc.                                                         |
| Beverages and alcohol               | Coffee, green tea, black tea, hot chocolate, carbonated beverage, beer, liquor, whiskey, etc. |
| Seasonings                          | Soy sauce, red pepper, mayonnaise, ketchup, salt, etc.                                        |
| Etc.                                | Etc.                                                                                          |

Table S2. Intakes of food groups (g /day or ml/day<sup>§</sup>) by cluster, n=2,065

| <b>Food group</b>                    | <b>Cluster 1 – Diet dominant in fruits and fish (n=949)</b> | <b>Cluster 2 – Diet dominant in meats (n=271)</b> | <b>Cluster 3 – Diet dominant in white rice and kimchi (n=845)</b> |
|--------------------------------------|-------------------------------------------------------------|---------------------------------------------------|-------------------------------------------------------------------|
| White rice                           | 13.61                                                       | 12.63                                             | 31.35                                                             |
| Other grain                          | 3.68                                                        | 3.28                                              | 3.78                                                              |
| Noodles and dumpling                 | 2.03                                                        | 2.44                                              | 1.94                                                              |
| Flour and bread                      | 1.04                                                        | 1.35                                              | 0.77                                                              |
| Pizza, hamburger, cereals and snack  | 0.20                                                        | 0.29                                              | 0.18                                                              |
| Potatoes                             | 3.35                                                        | 2.56                                              | 2.06                                                              |
| Sugars and sweets                    | 0.66                                                        | 0.71                                              | 0.71                                                              |
| Legumes                              | 2.78                                                        | 2.84                                              | 4.83                                                              |
| Nuts and seeds                       | 0.42                                                        | 0.37                                              | 0.34                                                              |
| Vegetables                           | 14.62                                                       | 13.89                                             | 17.48                                                             |
| Kimchi                               | 8.01                                                        | 7.32                                              | 14.57                                                             |
| Mushrooms                            | 0.22                                                        | 0.22                                              | 0.27                                                              |
| Fruits                               | 23.88                                                       | 5.26                                              | 3.63                                                              |
| Meats and meat products              | 3.46                                                        | 4.22                                              | 3.59                                                              |
| Eggs                                 | 1.23                                                        | 1.34                                              | 1.07                                                              |
| Fishes and seafood                   | 8.22                                                        | 5.52                                              | 3.97                                                              |
| Seaweeds                             | 3.08                                                        | 1.13                                              | 0.86                                                              |
| Milk and dairy products <sup>§</sup> | 4.69                                                        | 2.72                                              | 3.03                                                              |
| Oils <sup>§</sup>                    | 0.33                                                        | 0.40                                              | 0.37                                                              |
| Beverages and alcohol <sup>§</sup>   | 2.31                                                        | 29.44                                             | 2.40                                                              |
| Seasonings <sup>§</sup>              | 1.73                                                        | 1.79                                              | 2.45                                                              |
| Etc.                                 | 0.45                                                        | 0.46                                              | 0.33                                                              |
